# Supplementary material for: A Matlab-based toolbox for characterizing behavior of rodents engaged in string-pulling
Source: eLife journal article supplement (doi:10.7554/elife.54540), 2020-06-26
Supplement: supp [file elife-54540-supp-v1.zip]

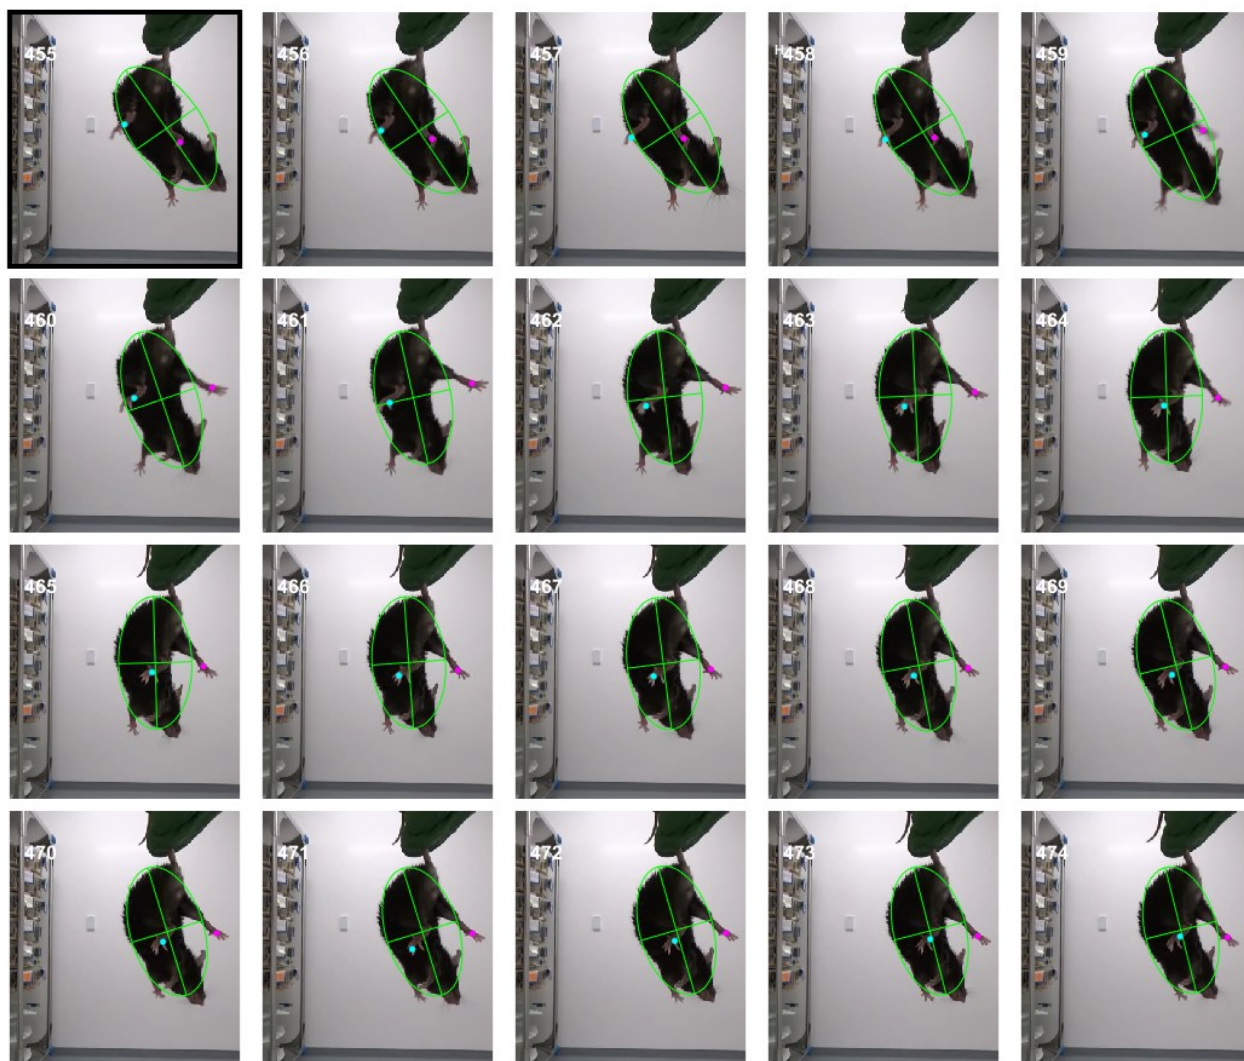

**Figure 14 – figure supplement 1. General applicability of the software for tracking objects shown in a video of a tail-clasped mouse where hind paws and body are tracked.**
