# Supplementary material for: A Matlab-based toolbox for characterizing behavior of rodents engaged in string-pulling
Source: eLife journal article supplement (doi:10.7554/elife.54540), 2020-06-26
Supplement: supp [file elife-54540-supp-v1.zip]

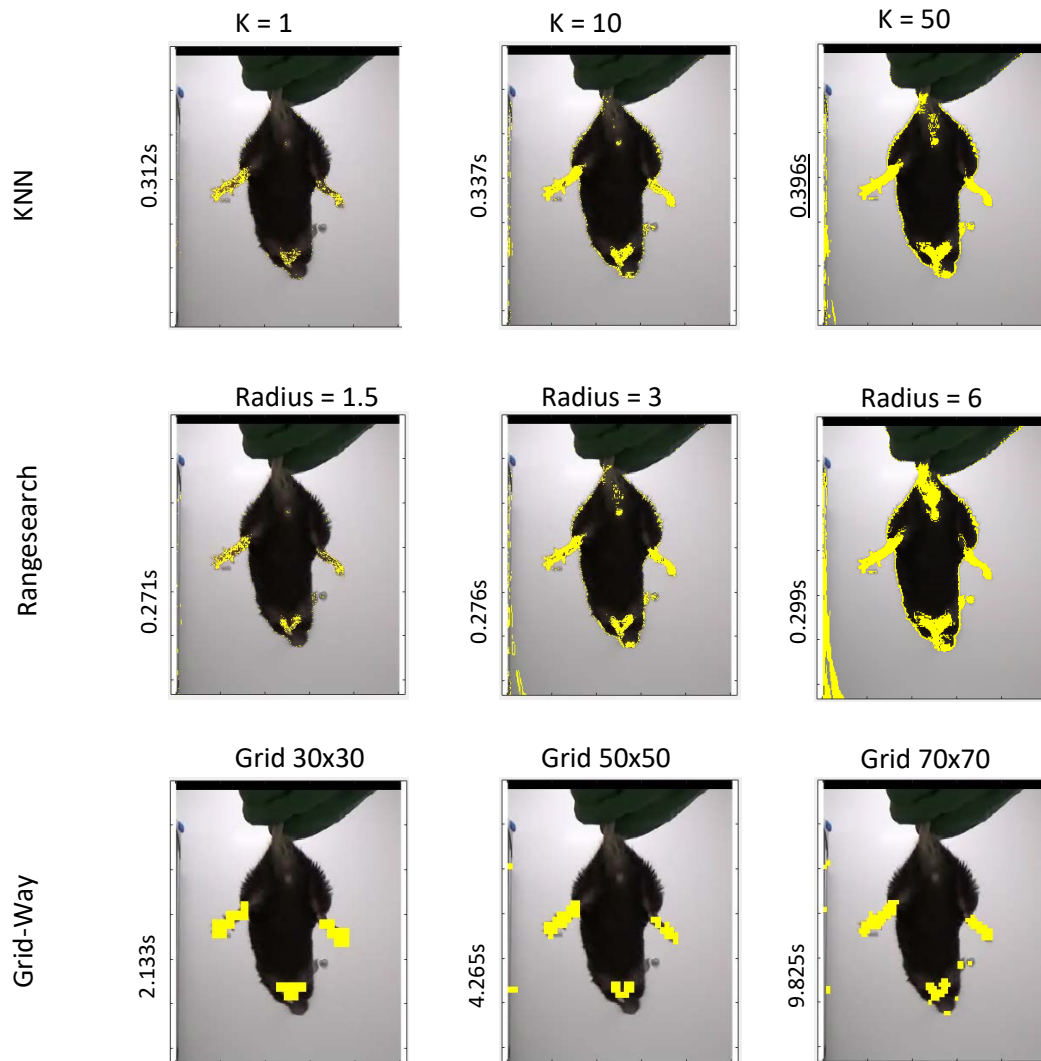

**Figure 15 – figure supplement 1. Masks found with KNN, rangesearch, and custom (grid-way) algorithm. The Grid-Way produces cleaner masks (eliminating noisy pixels) with sparser identified regions for more efficient subsequent automatic identification of body parts. Masks found for hind paws with three methods. Text on top of each mask shows the respective parameter value used to find the mask and text on the side indicates time taken in seconds to find the mask. Computational time is the largest for the Grid-Way method, but masks are cleaner and easier to operate for heuristic algorithms.**
