# Supplementary material for: A Matlab-based toolbox for characterizing behavior of rodents engaged in string-pulling
Source: eLife journal article supplement (doi:10.7554/elife.54540), 2020-06-26
Supplement: supp [file elife-54540-supp-v1.zip]

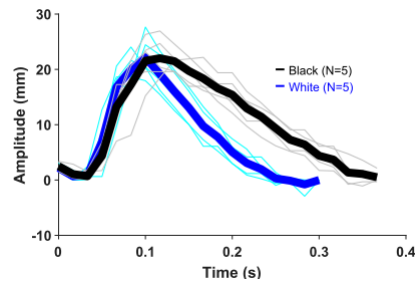

**Figure 11 – figure supplement 1. Temporal profiling of reach cycle for black and white mice with Dynamic Time Warping.** Light gray and light blue lines indicate time-warped average reach cycles for individual Black and White mice respectively. Darker lines (black and blue) indicate time-warped group average reach cycles. “Time-warped average reach cycle” for each animal was found by the following steps; **1)** individual reach cycles were zero padded to make their lengths equal, **2)** average reach cycle was obtained from zero padded cycles, **3)** time warping of original cycles was done with average reach cycle obtained in step 2 using Matlab’s “dtw” function, **4)** averaging of individually time-warped reach cycles obtained in previous step provided time-warped average reach cycle for an animal (shown by light gray and light blue lines). By following similar steps, time-warped group average reach cycle was found (darker lines, black and blue).
