# Supplementary material for: A Matlab-based toolbox for characterizing behavior of rodents engaged in string-pulling
Source: eLife journal article supplement (doi:10.7554/elife.54540), 2020-06-26
Supplement: supp [file elife-54540-supp-v1.zip]

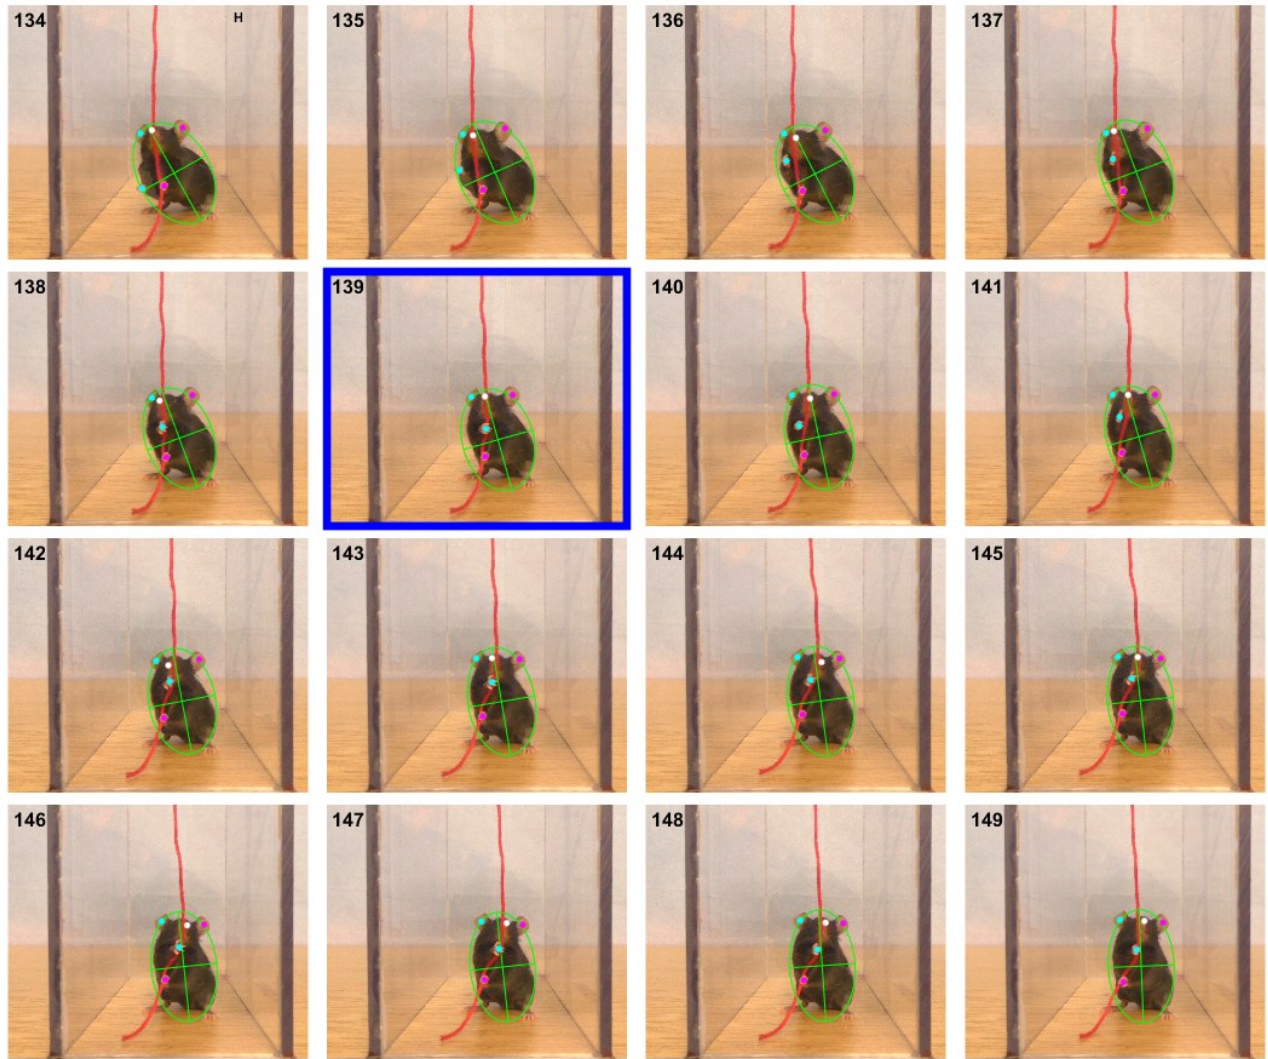

**Figure 15 – figure supplement 2. Robustness of image segmentation shown in a video with different camera angle with a mouse on a table with brown base.** Identification of body, ears, nose, and hands was done with 100, 100, 100, and 95 percent accuracy in the 40 frames analyzed for testing image segmentation and tracking algorithms.
