# Supplementary material for: A Matlab-based toolbox for characterizing behavior of rodents engaged in string-pulling
Source: eLife journal article supplement (doi:10.7554/elife.54540), 2020-06-26
Supplement: supp [file elife-54540-supp-v1.zip]

Archive with 9 entries (9 files):
- elife_poa_e54540_Video_1.avi
- elife_poa_e54540_Video_2.avi
- elife_poa_e54540_Transparent_Reporting_File.docx
- elife_poa_e54540_Figure_9_figure_supplement_1.pdf
- elife_poa_e54540_Figure_10_figure_supplement_1.pdf
- elife_poa_e54540_Figure_11_figure_supplement_1.pdf
- elife_poa_e54540_Figure_14_figure_supplement_1.pdf
- elife_poa_e54540_Figure_15_figure_supplement_1.pdf
- elife_poa_e54540_Figure_15_figure_supplement_2.pdf
