# Supplementary material for: A Matlab-based toolbox for characterizing behavior of rodents engaged in string-pulling
Source: eLife journal article supplement (doi:10.7554/elife.54540), 2020-06-26
Supplement: supp [file elife-54540-supp-v1.zip › elife_poa_e54540_Figure_10_figure_supplement_1.pdf]

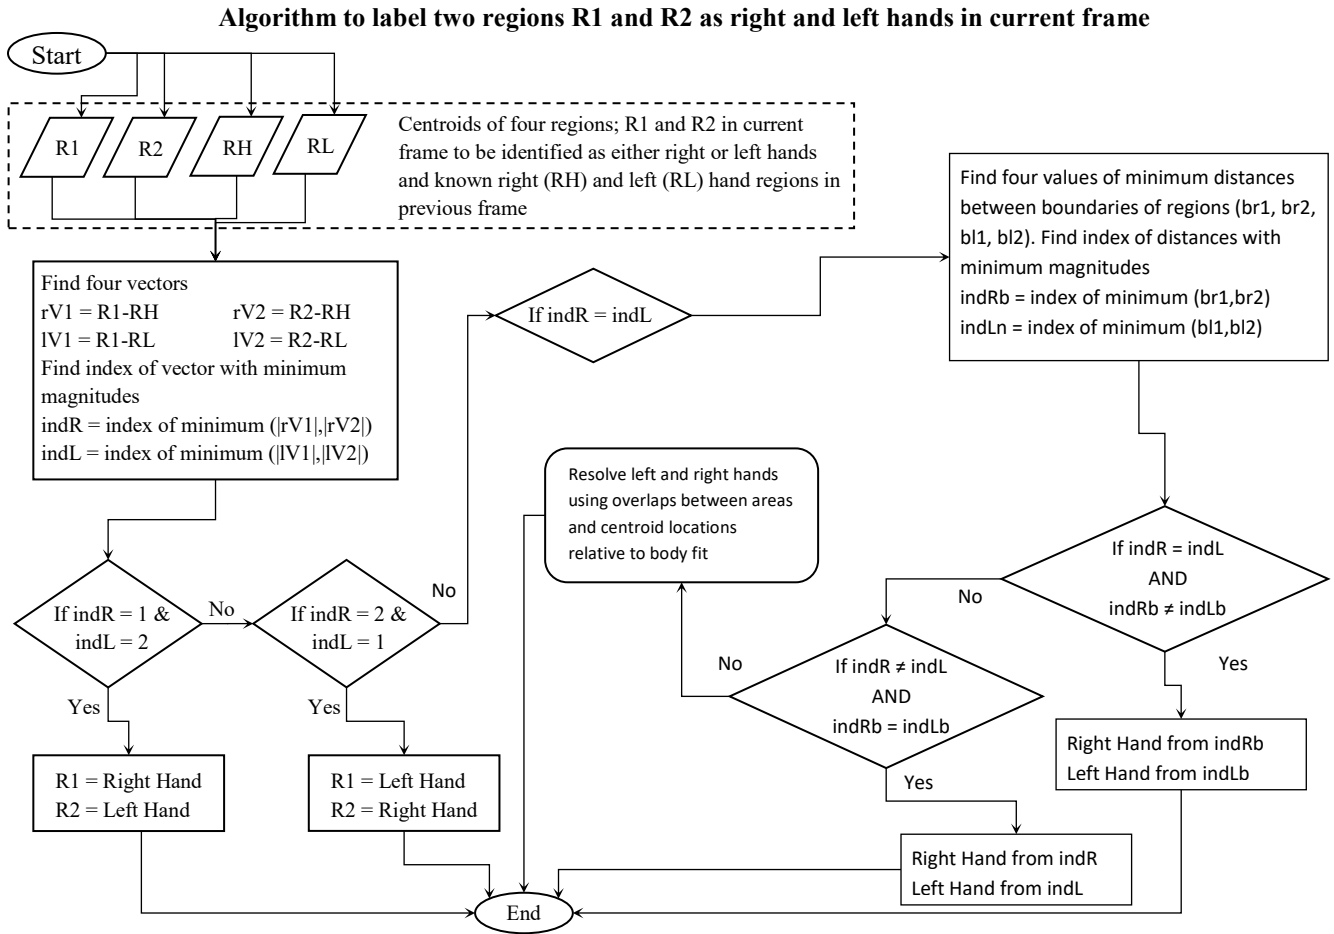

**Figure 10 – figure supplement 1. Algorithm to label right- and left-hand regions from two unlabelled regions.** The algorithm primarily uses distances of unlabelled regions from the right- and left-hand regions in the previous frame to label them as right and left hands.
